# Supplementary material for: Structural basis for helicase-polymerase coupling in the SARS-CoV-2 replication-transcription complex
Source: PubMed Central journal article supplement — bioRxiv. 2020 Jul 13:2020.07.08.194084. Preprint. [Version 2] doi: 10.1101/2020.07.08.194084 (PMC7359531; doi:10.1101/2020.07.08.194084), 2020-07-13
Supplement: NIHPP2020.07.08.194084-supplement-1.pdf [file NIHPP2020.07.08.194084-supplement-1.pdf]

## SUPPLEMENTAL INFORMATION

**James Chen<sup>1</sup>, Brandon Malone<sup>1</sup>, Eliza Llewellyn<sup>1</sup>, Michael Grasso<sup>2</sup>, Patrick M. M. Shelton<sup>2</sup>, Paul Dominic B. Olinares<sup>3</sup>, Kashyap Maruthi<sup>4</sup>, Ed Eng<sup>4</sup>, Hasan Vatandaslar<sup>5</sup>, Brian T. Chait<sup>3</sup>, Tarun Kapoor<sup>2</sup>, Seth A. Darst<sup>1</sup> Elizabeth A. Campbell<sup>1</sup>**

<sup>1</sup>Laboratory of Molecular Biophysics, The Rockefeller University, New York, NY, 10065 USA.

<sup>2</sup>Laboratory of Chemistry and Cell Biology, The Rockefeller University, New York, NY, 10065 USA.

<sup>3</sup>Laboratory of Mass Spectrometry and Gaseous Ion Chemistry, The Rockefeller University, New York, NY, 10065 USA.

<sup>4</sup>The National Resource for Automated Molecular Microscopy, Simons Electron Microscopy Center, New York Structural Biology Center, New York, NY, 10027 USA.

<sup>5</sup>Institute of Molecular Health Sciences, ETH Zurich, 8093 Zürich, Switzerland.

Supplemental information includes 6 figures and 1 table.

**Table S1 | Cryo-EM data collection, refinement and validation statistics. Related to Figure 2.**

| <b>Dataset</b>                                      | <b>nsp13-RTC (CHAPSO)</b> |                                                                                    |                                        |
|-----------------------------------------------------|---------------------------|------------------------------------------------------------------------------------|----------------------------------------|
| <b>Sample ID</b>                                    | nsp13 <sub>1</sub> -RTC   | nsp13 <sub>2</sub> -RTC                                                            | (nsp13 <sub>2</sub> -RTC) <sub>2</sub> |
| <b>EMDB</b>                                         |                           | EMD-22160                                                                          |                                        |
| <b>PDB</b>                                          |                           | 6XEZ                                                                               |                                        |
| <b>Data collection and processing</b>               |                           |                                                                                    |                                        |
| Microscope                                          | FEI Titan Krios           | FEI Titan Krios                                                                    | FEI Titan Krios                        |
| Voltage (kV)                                        | 300                       | 300                                                                                | 300                                    |
| Detector                                            | Gatan K3                  | Gatan K3                                                                           | Gatan K3                               |
| Electron exposure (e <sup>-</sup> /Å <sup>2</sup> ) | 64                        | 64                                                                                 | 64                                     |
| Defocus range (µm)                                  | -0.8 to -2.5              | -0.8 to -2.5                                                                       | -0.8 to -2.5                           |
| Data collection mode                                | Counting Mode             | Counting Mode                                                                      | Counting Mode                          |
| Nominal Magnification                               | 81,000x                   | 81,000x                                                                            | 81,000x                                |
| Pixel size (Å)                                      | 1.1                       | 1.1                                                                                | 1.1                                    |
| Symmetry imposed                                    | C1                        | C1                                                                                 | C1                                     |
| Initial particle images (no.)                       | 1447307                   | 1447307                                                                            | 1447307                                |
| Final particle images (no.)                         | 17345                     | 58942                                                                              | 11771                                  |
| Map resolution (Å) - FSC threshold 0.143            | 4.0                       | 3.5                                                                                | 7.9                                    |
| Map resolution range (Å)                            | 3.2-7.6                   | 2.8-7.1                                                                            | 4.0-10.3                               |
| <b>Refinement</b>                                   |                           |                                                                                    |                                        |
| Initial model used (PDB code)                       |                           | 6YYT/6JYT                                                                          |                                        |
| Map sharpening B factor (Å <sup>2</sup> )           | -60.7                     | -76.8                                                                              | -417.7                                 |
| Model composition                                   |                           |                                                                                    |                                        |
| Non-hydrogen atoms                                  |                           | 21,744                                                                             |                                        |
| Protein residues                                    |                           | 2,563                                                                              |                                        |
| Nucleic acid residues (RNA)                         |                           | 70                                                                                 |                                        |
| Ligands                                             |                           | 8 Zn <sup>2+</sup> , 3 Mg <sup>2+</sup> ,<br>3 CHAPSO,<br>3 ADP, 2 AF <sub>3</sub> |                                        |
| B factors (Å <sup>2</sup> )                         |                           |                                                                                    |                                        |
| Protein                                             |                           | 50.08                                                                              |                                        |
| Nucleic acid                                        |                           | 75.64                                                                              |                                        |
| Ligands                                             |                           | 89.8                                                                               |                                        |
| R.m.s. deviations                                   |                           |                                                                                    |                                        |
| Bond lengths (Å)                                    |                           | 0.01                                                                               |                                        |
| Bond angles (°)                                     |                           | 0.945                                                                              |                                        |
| Validation                                          |                           |                                                                                    |                                        |
| MolProbity score                                    |                           | 3.20                                                                               |                                        |
| Clashscore                                          |                           | 19.89                                                                              |                                        |

|                   |       |
|-------------------|-------|
| Poor rotamers (%) | 10.77 |
| Ramachandran plot |       |
| Favored (%)       | 86.91 |
| Allowed (%)       | 13.01 |
| Disallowed (%)    | 0.08  |



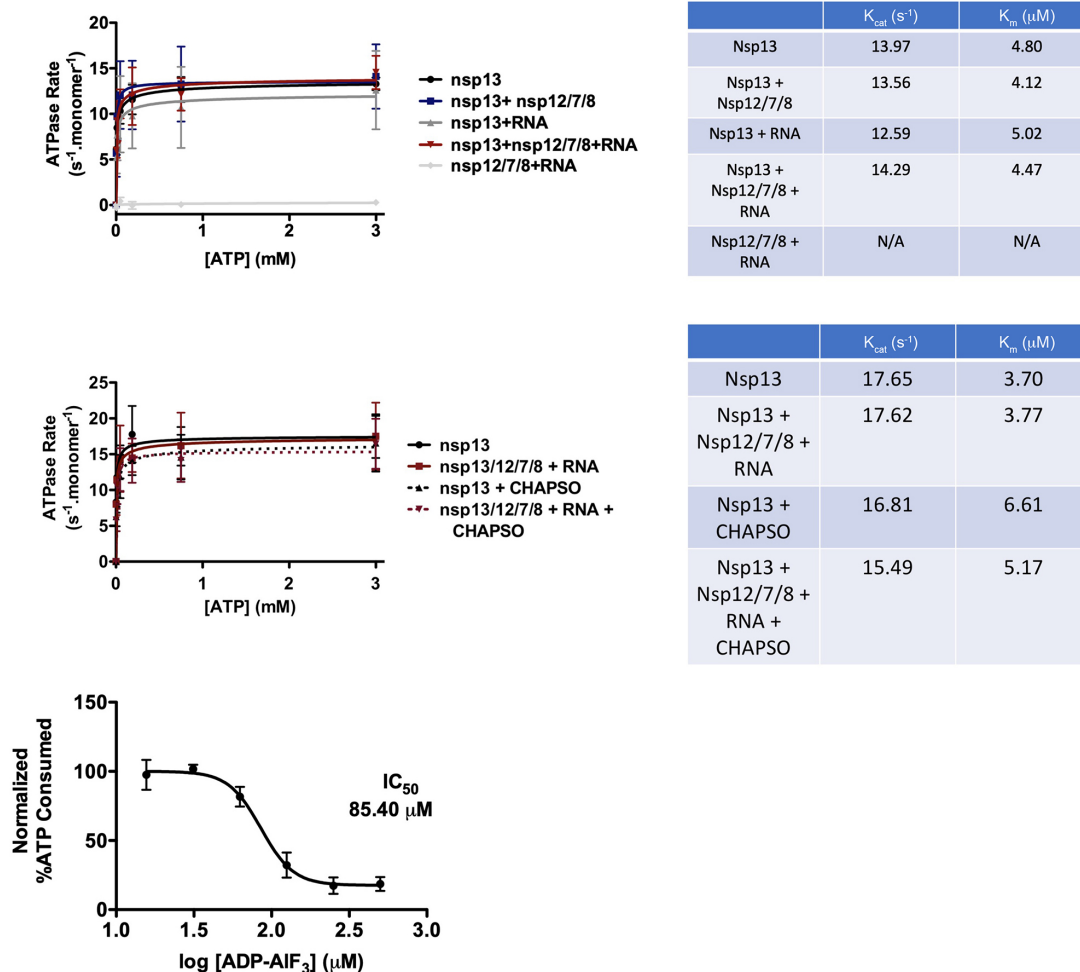

**Figure S2. Nsp13 activities. Related to Figure 1.**

**a. (left)** ATPase assay comparing nsp13 alone, nsp13 + holo-RdRp (nsp12/7/8), nsp13 + RNA scaffold alone, nsp13-RTC (nsp13/12/7/8 + RNA), and the RTC alone (nsp12/7/8 + RNA). Error bars indicate the range for two independent measurements.

*(right)* Calculated K<sub>cat</sub> and K<sub>m</sub> values for the ATPase assay.

**b. (left)** ATPase assay comparing nsp13 alone and nsp13-RTC (nsp13/12/7/8 + RNA) ± 8 mM CHAPSO. Error bars indicate the range for two independent measurements.

*(right)* Calculated K<sub>cat</sub> and K<sub>m</sub> values for the ATPase assay.

**c.** Inhibitory effect of ADP-AIF<sub>3</sub> on nsp13 ATPase activity (N=6). Error bars denote standard deviation.

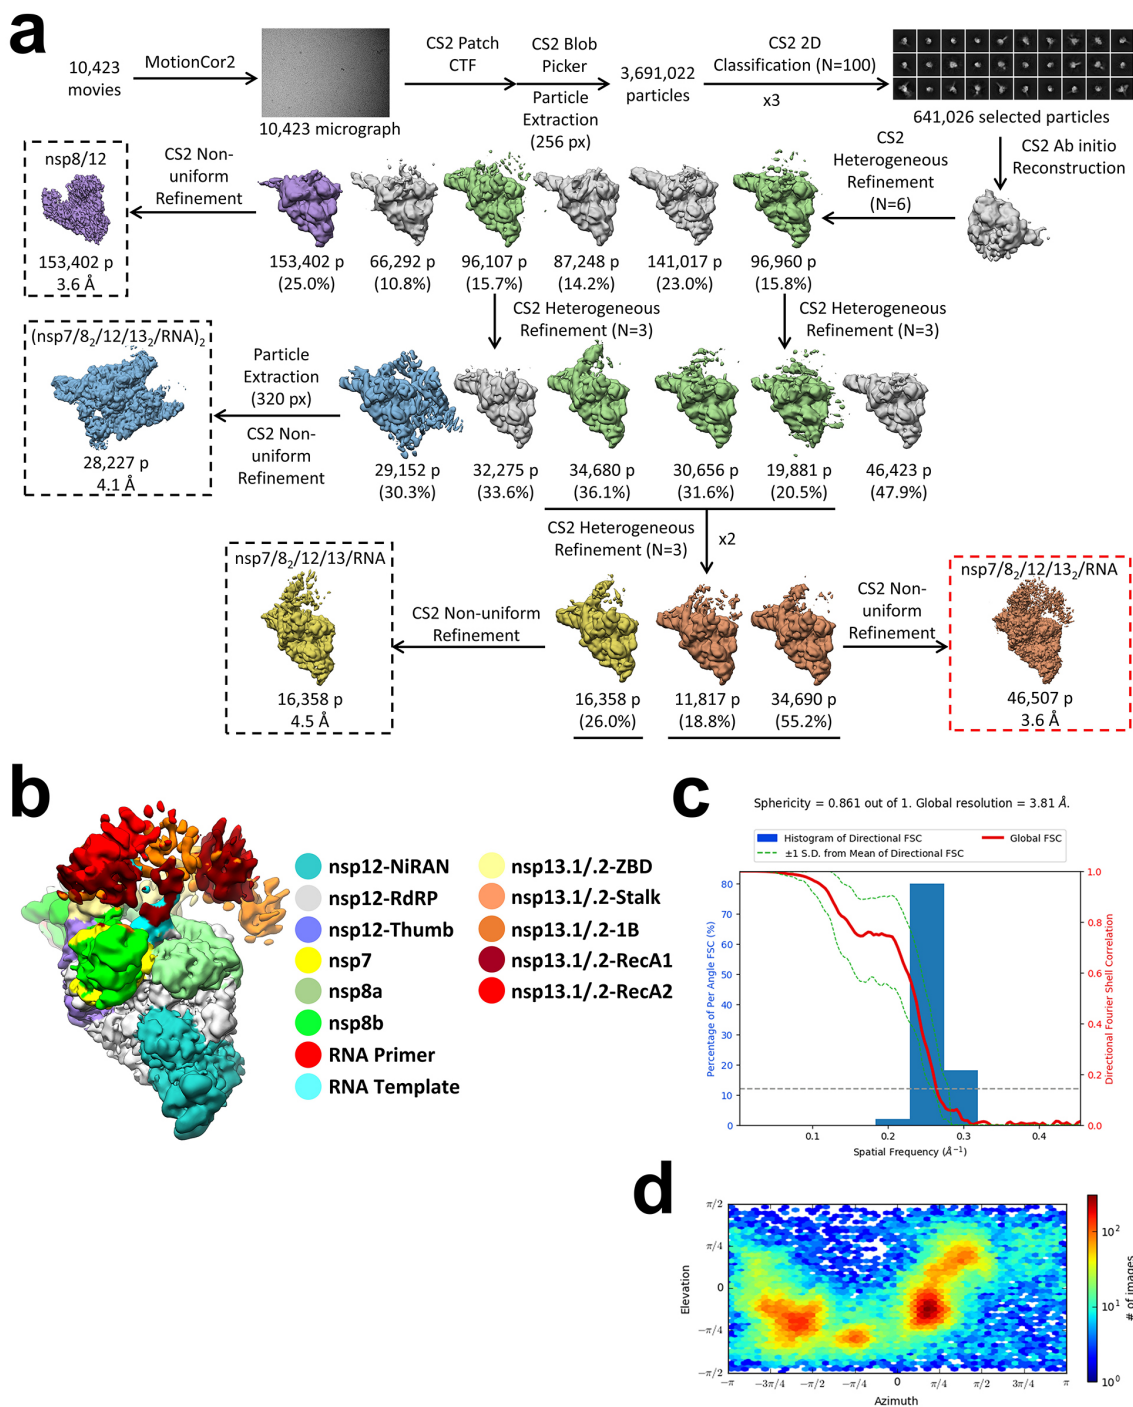

Figure S3

**Figure S3. Cryo-EM processing pipeline and analysis for nsp13-RTC (no detergent) dataset. Related to Figure 2.**

- a.** Cryo-EM processing pipeline.
- b.** Nominal 3.6 Å-resolution cryo-EM reconstruction of nsp13<sub>2</sub>-RTC (no detergent) filtered by local resolution (Cardone et al., 2013) and colored by subunit according to the key on the right.
- c.** Directional 3D Fourier shell correlation (FSC) for nsp13<sub>2</sub>-RTC (no detergent) calculated by 3DFSC (Tan et al., 2017).
- d.** Angular distribution plot for reported nsp13<sub>2</sub>-RTC (no detergent) calculated in cryoSPARC. Scale shows the number of particles assigned to a particular angular bin. Blue, a low number of particles; red, a high number of particles.

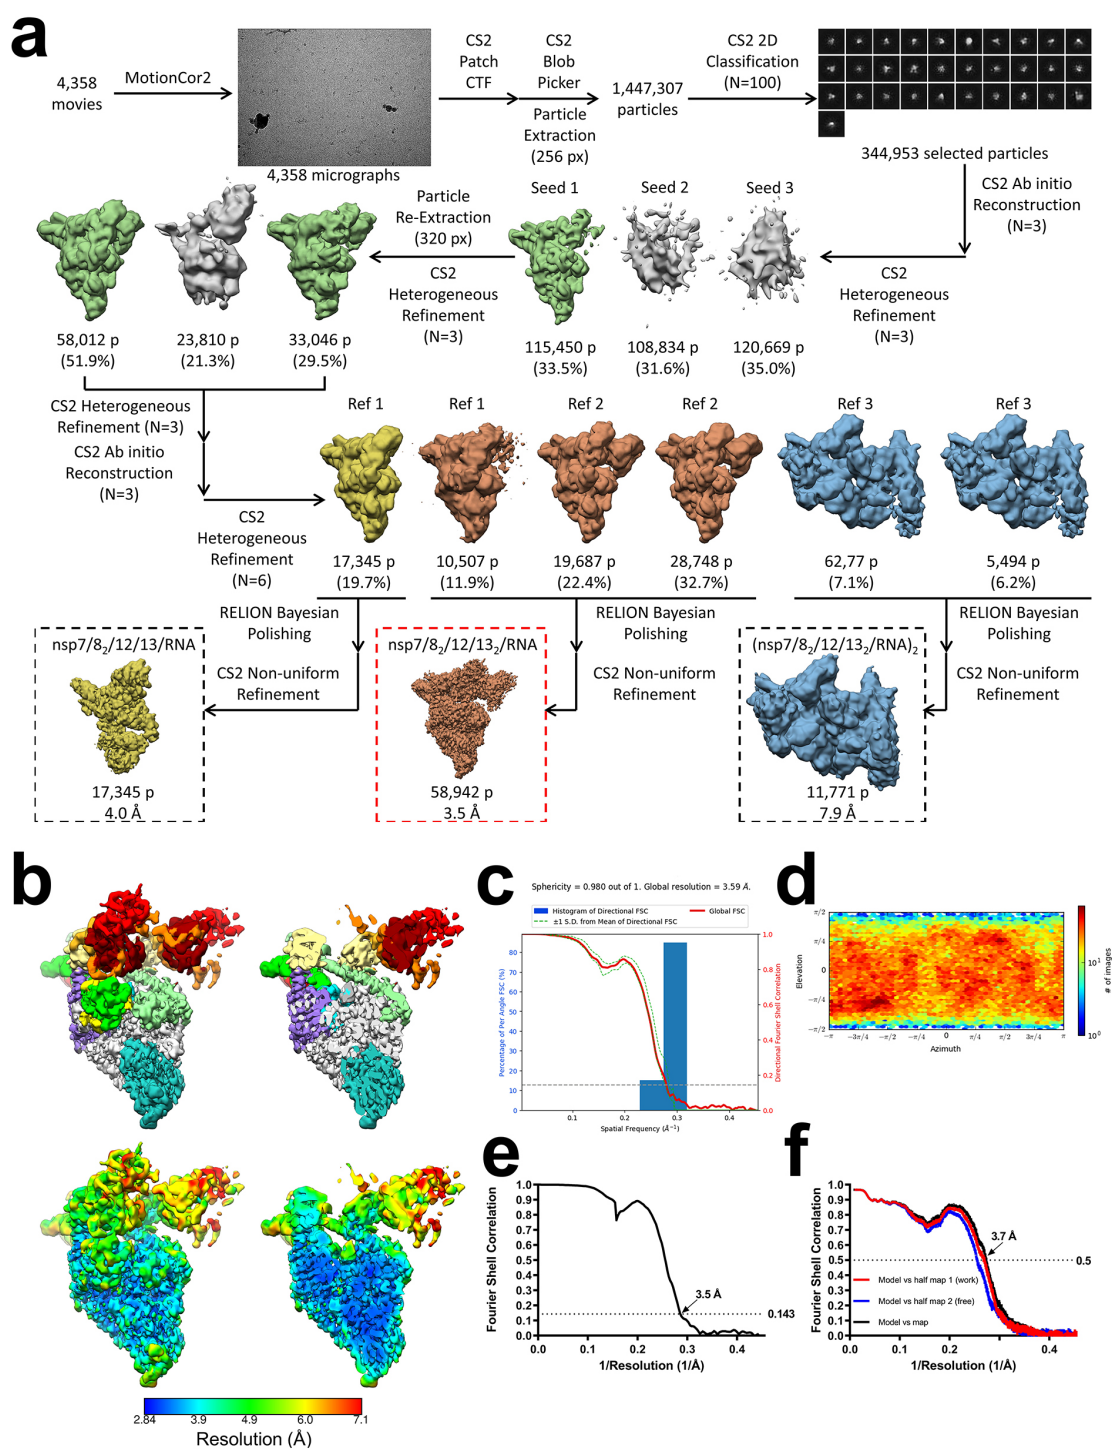

Figure S4



**Figure S4. Cryo-EM processing pipeline and analysis for nsp13-RTC (CHAPSO) dataset. Related to Figure 2.**

**a.** Cryo-EM processing pipeline.

**b.** Nominal 3.5 Å-resolution cryo-EM reconstruction of nsp13<sub>2</sub>-RTC (CHAPSO) filtered by local resolution (Cardone et al., 2013). The view on the right is a cross-section.

*(top)* Colored by subunit.

*(bottom)* Color by local resolution (key on the bottom).

**c.** Directional 3D Fourier shell correlation (FSC) for nsp13<sub>2</sub>-RTC (CHAPSO) calculated by 3DFSC (Tan et al., 2017).

**d.** Angular distribution plot for reported nsp13<sub>2</sub>-RTC (CHAPSO) calculated in cryoSPARC. Scale shows the number of particles assigned to a particular angular bin. Blue, a low number of particles; red, a high number of particles.

**e.** Gold-standard FSC plot for nsp13<sub>2</sub>-RTC (CHAPSO), calculated by comparing two independently determined half-maps from cryoSPARC. The dotted line represents the 0.143 FSC cutoff which indicates a nominal resolution of 3.5 Å.

**f.** FSC calculated between the refined structure and the half map used for refinement (work, red), the other half map (free, blue), and the full map (black).

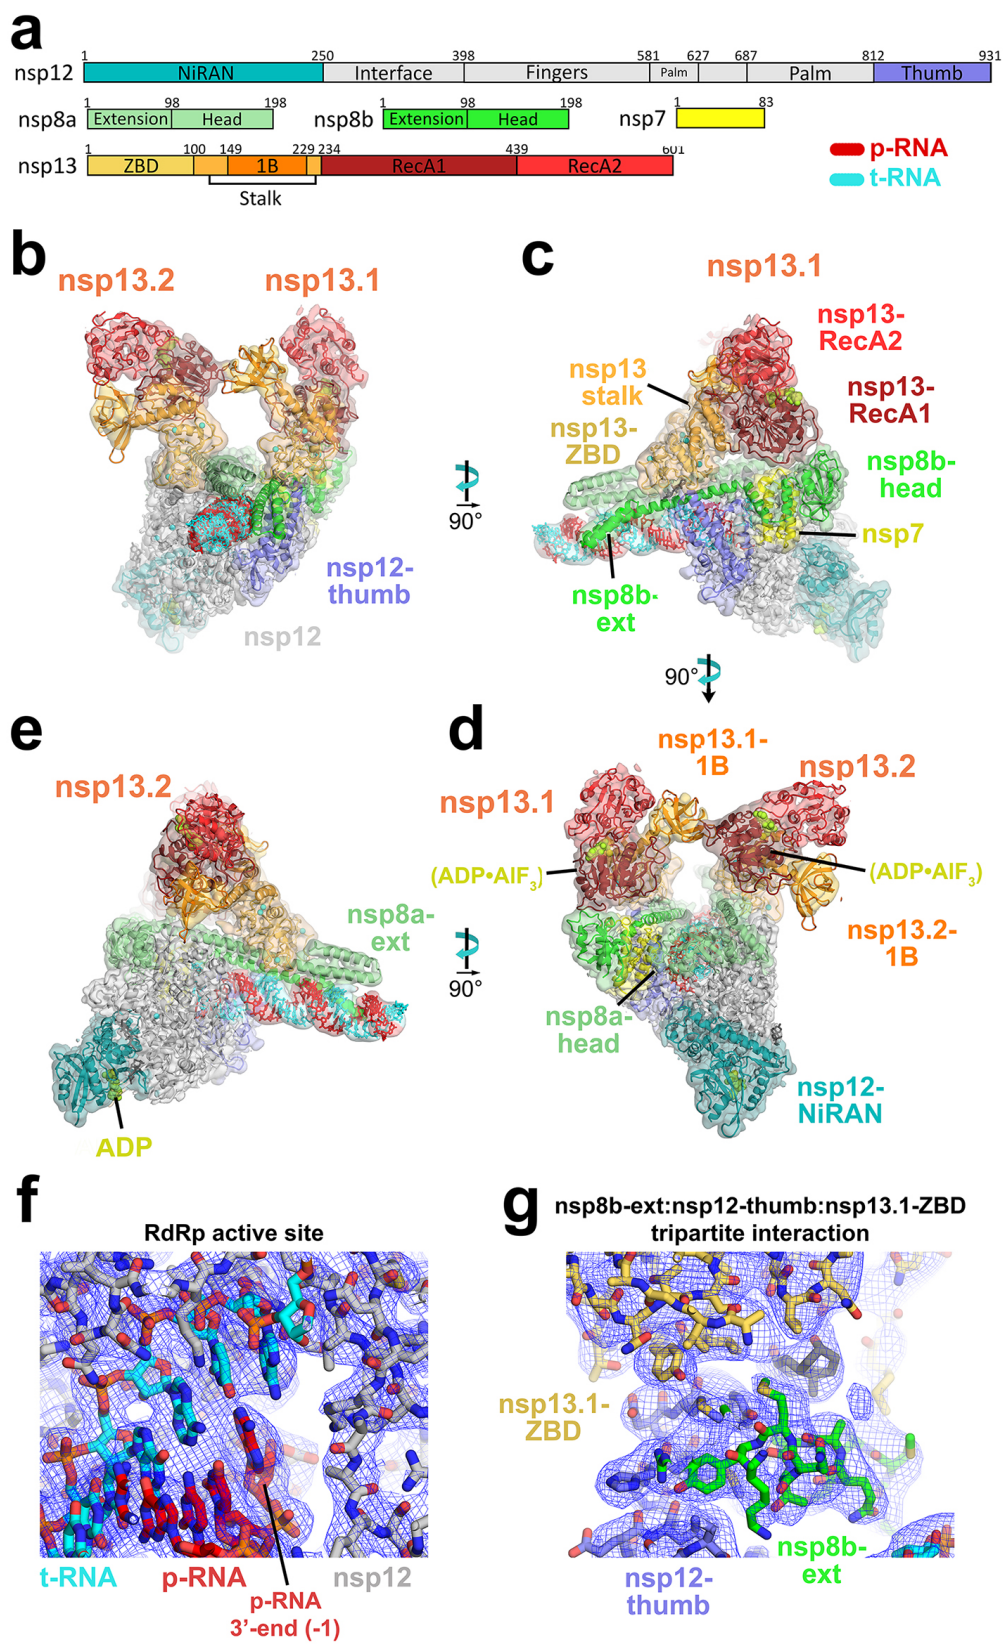

Figure S5

**Figure S5. Cryo-EM density maps. Related to Figure 2.**

**a.** Schematic illustrating domain structure of SARS-CoV-2 holo-RdRp (nsp7, nsp8, nsp12) and nsp13. The color-coding corresponds to the figures throughout this manuscript unless otherwise specified.

**b-e.** Orthogonal views showing the overall architecture of the nsp13<sub>2</sub>-RTC. Shown is the transparent cryo-EM density (local-resolution filtered) with the nsp13<sub>2</sub>-RTC model superimposed. Same views as Figure 2b-e.

**f.** View of the nsp12 (RdRp) active site (refined model superimposed onto the cryo-EM density, shown as blue mesh), showing the post-translocated state of the RNA.

**g.** View of the nsp8b-extension:nsp12-thumb:nsp13-ZBD tripartite interaction (refined model superimposed onto the cryo-EM density, shown as blue mesh). Similar view as Figure 3a.

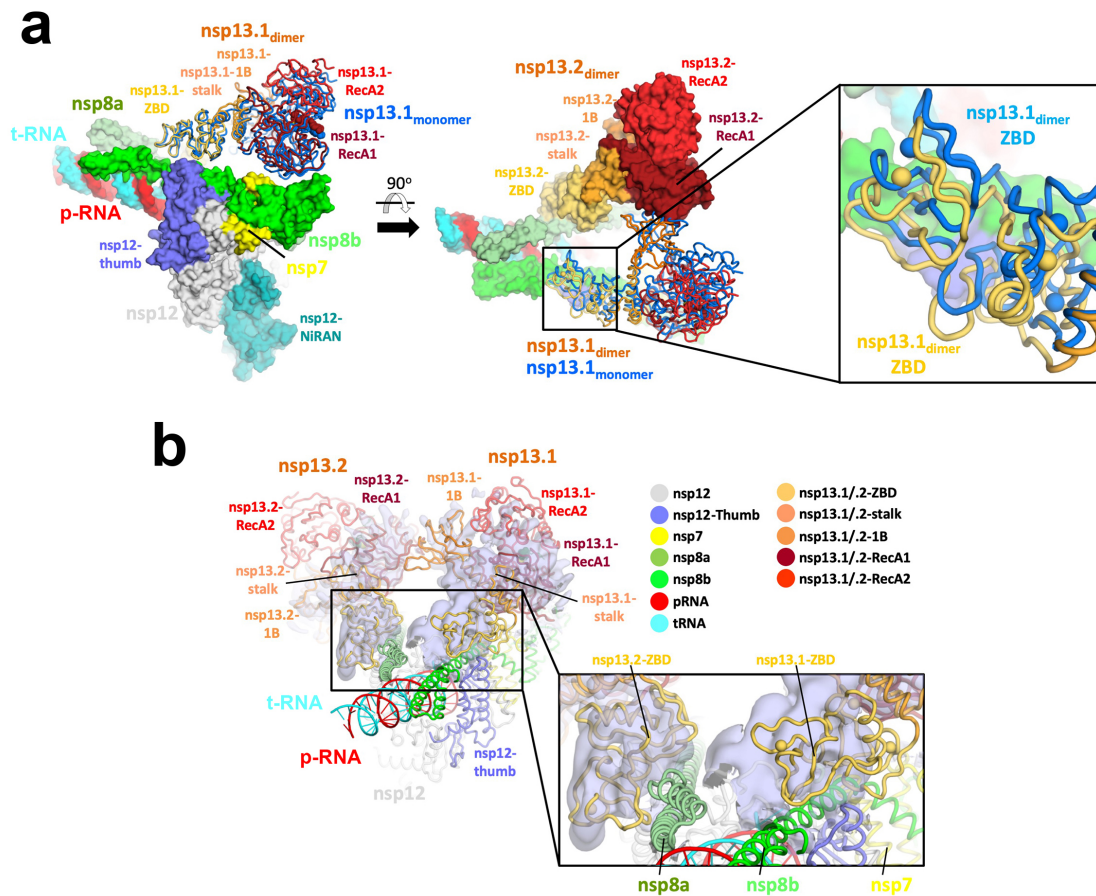

Figure S6

**Figure S6. Comparison of nsp13<sub>2</sub>-RTC (CHAPSO) structure with nsp13<sub>1</sub>-RTC (CHAPSO) and nsp13<sub>2</sub>-RTC (no detergent). Related to Figure 3.**

**a.** Structure of nsp13<sub>2</sub>-RTC (CHAPSO) colored according to key in **b** and shown as a molecular surface except nsp13.1, which is shown as cartoon tubes. Superimposed on the overall structure is nsp13 (marine) modeled from the nsp13<sub>1</sub>-RTC (CHAPSO). Overall RMSD (calculated using 'rms\_cur' in PyMOL) between the two nsp13.1 structures is 8.1 Å over 596 Cα atoms. (left) overall structure. (middle) overall structure rotated 90°. (right) zoom-in of boxed region in middle panel, showing region around nsp13.1-ZBD.s RMSD (calculated using 'rms\_cur' in PyMOL) between the two nsp13.1 ZBDs is 3.6 Å over 100 Cα atoms.

**b.** Structure of nsp13<sub>2</sub>-RTC (CHAPSO) is shown in cartoon tubes, colored based on key, and superimposed onto the cryo-EM map from the nsp13<sub>2</sub>-RTC (no detergent) dataset (shown as light blue transparent surface). Density map is locally filtered by resolution and difference density for nsp13 is highlighted using 'isosurf' command in PyMOL with 10 Å carve buffer. (left) overall structure. (right) zoom-in of boxed region in left panel, showing region around nsp13-ZBDs.
